# Supplementary material for: Memory Function and Brain Functional Connectivity Adaptations Following Multiple-Modality Exercise and Mind–Motor Training in Older Adults at Risk of Dementia: An Exploratory Sub-Study
Source: PubMed Central journal article supplement (PMC7052336; doi:10.3389/fnagi.2020.00022), 2020-02-25
Supplement: Data_Sheet_1.pdf [file Data_Sheet_1.pdf]

*Supplementary Material*

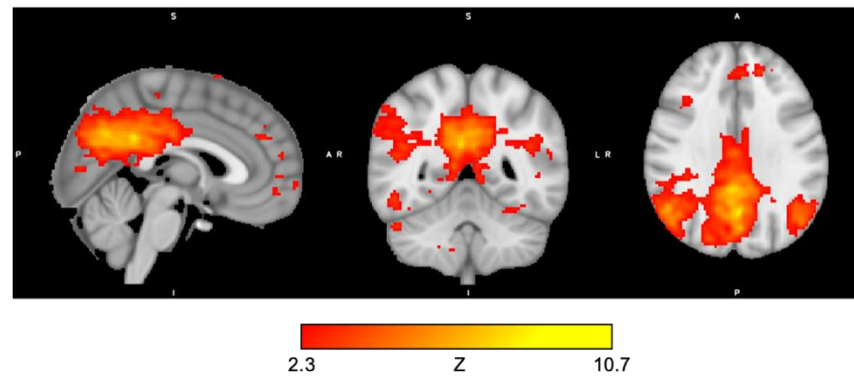

**Supplementary Figure 1.** Default mode network (DMN) identified via group independent component analysis (ICA) during Monkey Ladder task.

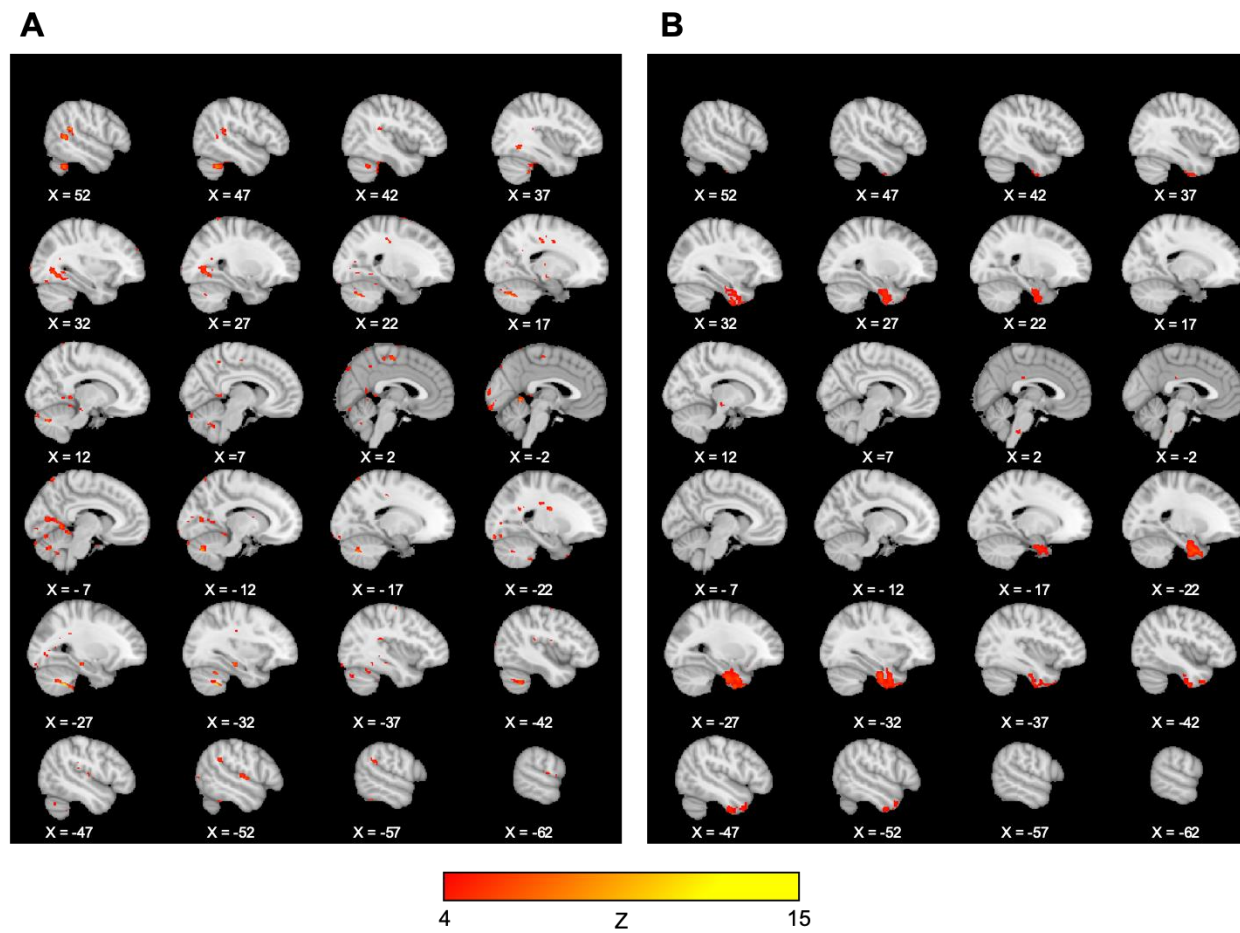

**Supplementary Figure 2.** Group-level spatial maps (A = PA15; B = PA34) identified via independent component analysis (ICA) during Paired Associates task.

**Supplementary Table 1.** Baseline demographic and clinical characteristics.

| Variables                      | Study sample (n = 9) |
|--------------------------------|----------------------|
| Demographics                   |                      |
| Age, yr                        | 67.8 (8.8)           |
| Women, <i>n</i>                | 8                    |
| Caucasian, <i>n</i>            | 9                    |
| Education, yr                  | 14.1 (3.1)           |
| MoCA, score                    | 24.9 (2.9)           |
| MMSE, score                    | 29.2 (0.7)           |
| Hypertension, <i>n</i>         | 5                    |
| Hypercholesterolemia, <i>n</i> | 2                    |
| Type 2 diabetes, <i>n</i>      | 1                    |

Data presented either as mean (standard deviation) or *n* where applicable.

Note: MMSE, Mini-Mental Status Examination; MoCA, Montreal Cognitive Assessment.

**Supplementary Table 2.** Changes in behavioral cognitive tasks from baseline to 24 weeks.

| Behavioral tasks    | Baseline  | 24 weeks  | Differences from baseline<br>(95% confidence interval) | <i>t</i> Value | <i>p</i> Value | Cohen's <i>d</i> |
|---------------------|-----------|-----------|--------------------------------------------------------|----------------|----------------|------------------|
| Monkey Ladder †     |           |           |                                                        |                |                |                  |
| Max score           | 5.8 (.7)  | 6 (1.1)   | 0.3 (-0.3 to 0.8)                                      | 1              | 0.35           | 0.35             |
| Mean score          | 4 (0.5)   | 4.4 (0.6) | 0.4 (-0.1 to 0.9)                                      | 1.7            | 0.12           | 0.62             |
| Spatial Span †      |           |           |                                                        |                |                |                  |
| Max score           | 4.4 (1.3) | 4.3 (0.9) | -0.1 (-1.3 to 1)                                       | -0.3           | 0.80           | -0.09            |
| Mean score          | 3.5 (0.9) | 3.5 (0.8) | 0.01 (-0.8 to 0.8)                                     | -0.02          | 0.99           | -0.01            |
| Digit Span          |           |           |                                                        |                |                |                  |
| Max score           | 6.2 (1.6) | 6.3 (1.1) | 0.1 (-0.4 to 0.6)                                      | 0.6            | 0.59           | 0.18             |
| Mean score          | 5.1 (1.2) | 5 (0.9)   | -0.1 (-0.5 to 0.3)                                     | -0.7           | 0.49           | -0.24            |
| Paired Associates † |           |           |                                                        |                |                |                  |
| Max score           | 3.9 (0.8) | 4.6 (0.9) | 0.8 (-0.1 to 1.6)                                      | 2              | 0.08           | 0.72             |
| Mean score          | 2.9 (0.4) | 3.3 (0.6) | 0.4 (-0.1 to 0.8)                                      | 2.1            | 0.08           | 0.74             |

Behavioral tasks are expressed in arbitrary units. Data presented as mean (standard deviation) or otherwise indicated. †Behavioral data missing for 1 participant in each task.
